# Supplementary material for: Packed-Fiber Solid Phase-Extraction Coupled with HPLC-MS/MS for Rapid Determination of Lipid Oxidative Damage Biomarker 8-Iso-Prostaglandin F2α in Urine
Source: MDPI journal article supplement (doi:10.3390/molecules27144417), 2022-07-10
Supplement: s1 [file s1]

# Packed-fiber Solid Phase Extraction Coupled with HPLC-MS/MS for Rapid Determination of Lipid Oxidative Damage Biomarker 8-iso-prostaglandin F<sub>2α</sub> in Urine

Ying Sun <sup>1</sup>, Yan Yan <sup>2</sup>, Xuejun Kang <sup>1,2\*</sup>

<sup>1</sup> Key Laboratory of Child Development and Learning Science, Ministry of Education, School of Biological Science & Medical Engineering, Southeast University, Nanjing, 210096, China; 230189182@seu.edu.cn;

<sup>2</sup> Key Laboratory of Environmental Medicine and Engineering (Ministry of Education), School of Public Health, Southeast University, Nanjing 210096, China; 230198875@seu.edu.cn

\* Correspondence: 101006214@seu.edu.cn; Tel.: +86-025-83795664-1011.

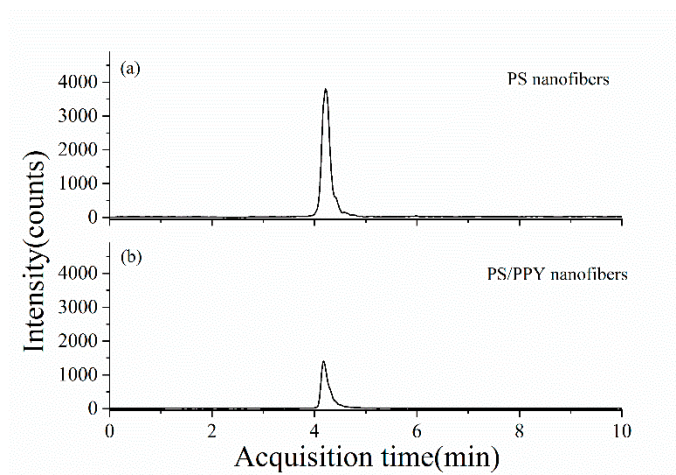

**Figure S1.** Representative chromatograms of PFSPE condition optimization. 1 mL 1 ng/mL standard solution processed with (a) PS nanofibers cartridge and (b) PS/PPY cartridge.

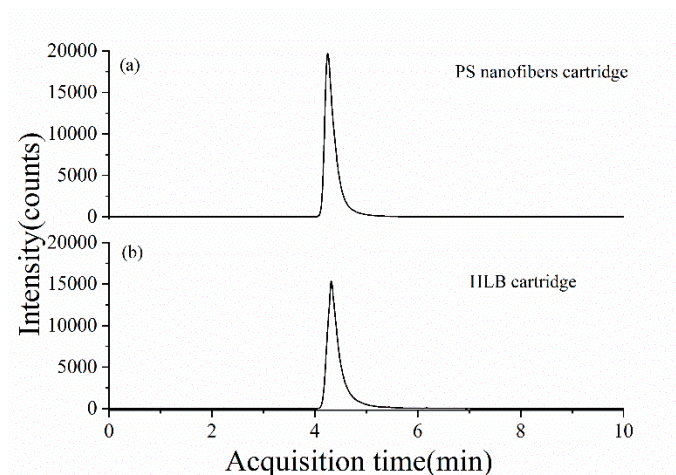

**Figure S2.** Representative chromatograms of 1 mL 5 ng/mL standard solution processed with (a) PS nanofibers cartridge and (b) HLB cartridge.

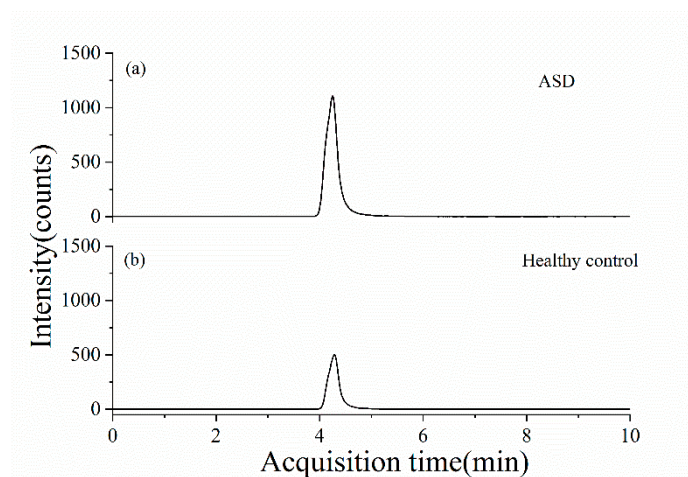

**Figure S3.** Representative chromatograms of urine of (a) ASD children and (b) healthy control.

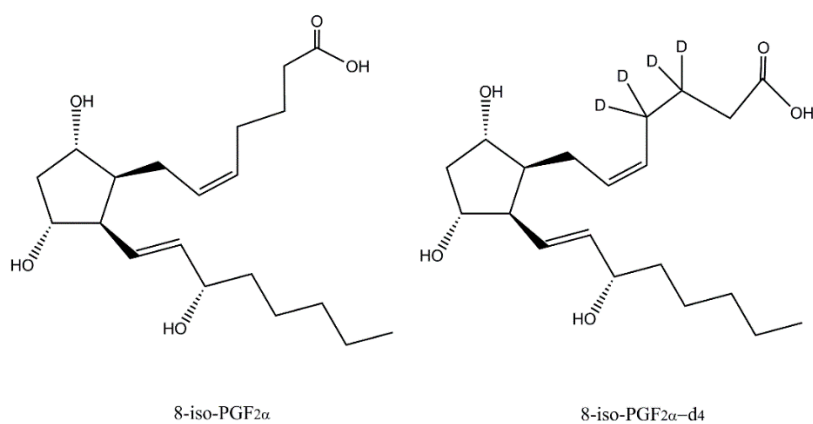

**Figure S4.** Structures of 8-iso-PGF<sub>2α</sub> and 8-iso-PGF<sub>2α</sub>-d<sub>4</sub>.

Table S1. The creatinine normalized 8-iso-PGF<sub>2α</sub> concentrations of ASD children and healthy controls.

| Group   | Concentration (ng/mg Cr) |      |      |      |      |      |
|---------|--------------------------|------|------|------|------|------|
|         | 1                        | 2    | 3    | 4    | 5    | 6    |
| ASD     | 0.17                     | 0.25 | 0.34 | 0.37 | 0.40 | 0.21 |
| Control | 0.11                     | 0.09 | 0.13 | 0.11 | 0.16 | 0.17 |
